# Supplementary material
Source: publisher figshare collection journal article supplement (https://acs.figshare.com/ndownloader/files/25679954)
Supplement: Supplementary file 1 [file 25679954]

Archive with 6 entries (6 files):
- info.xml
- tx9b00476_high_quality.mp4
- 1016_Permission_From_Photographer.pdf
- 1700_Model_Release_Person_in_Photograph.pdf
- 1802_Permission_for_Previously_Published_Copyrighted_Material.pdf
- tx9b00476.pdf
