# Supplementary material
Source: publisher figshare collection journal article supplement (https://acs.figshare.com/ndownloader/files/25679954)
Supplement: Supplementary file 1 [file 25679954 › info.xml]

<presentation>
	<article>
		<title>The Ah Receptor: Adaptive Metabolism, Ligand Diversity and the Xenokine Model</title>
		<doi>10.1021/acs.chemrestox.9b00476</doi>
		<copyright>American Chemical Society</copyright>
		<narrator>Mele Avilla</narrator>
		<contact>Mele Avilla</contact>
		<contact-email>mavilla@wisc.edu</contact-email>
		<author-list>
			<author>Christopher A. Bradfield</author>
		</author-list>
	</article>
	<slides height-width-ratio=".75">
		<slide audio-time="43">
			<subtitle/>
		</slide>
		<slide audio-time="49">
			<subtitle/>
		</slide>
		<slide audio-time="77">
			<subtitle/>
		</slide>
		<slide audio-time="122">
			<subtitle/>
		</slide>
		<slide audio-time="25">
			<subtitle/>
		</slide>
		<slide audio-time="120">
			<subtitle/>
		</slide>
		<slide audio-time="226">
			<subtitle/>
		</slide>
		<slide audio-time="37">
			<subtitle/>
		</slide>
	</slides>
	<audio duration="699"/>
</presentation>
